# Supplementary material
Source: MDPI journal article supplement (https://www.mdpi.com/2076-0752/13/2/53)
Supplement: s1 [file s1]

## Supplementary materials

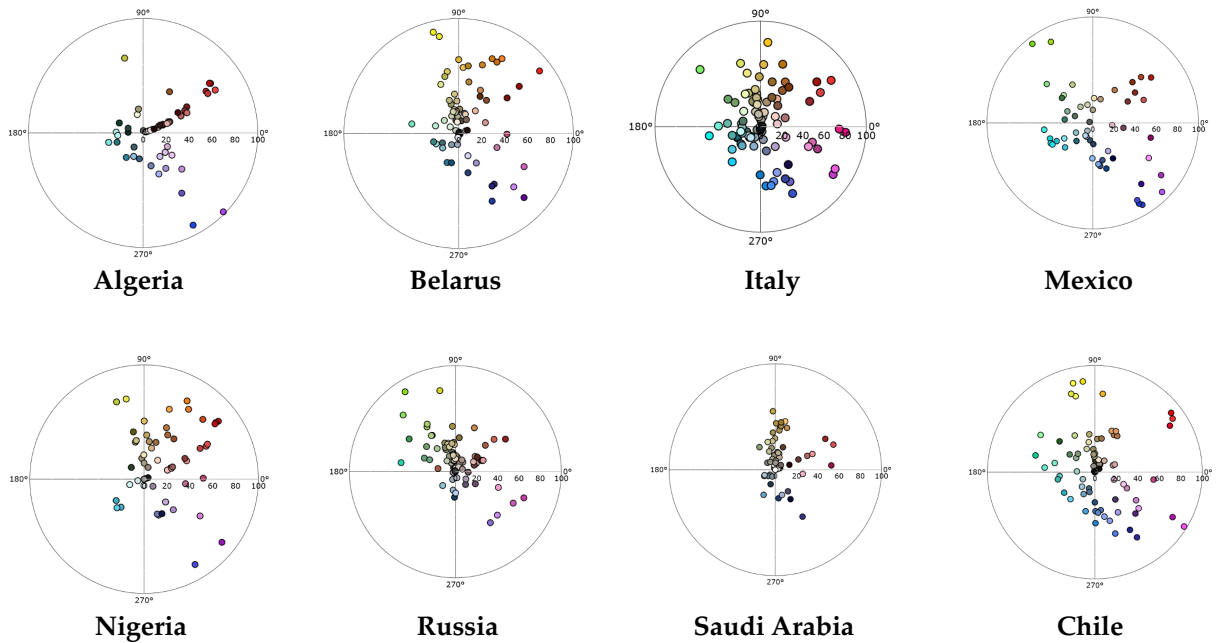

**Figure S1.** Hue ( $h^\circ$ ) and chroma (C) of colors, selected in different countries for the first color combination (chart 25); projection into the CIELCh color circle.

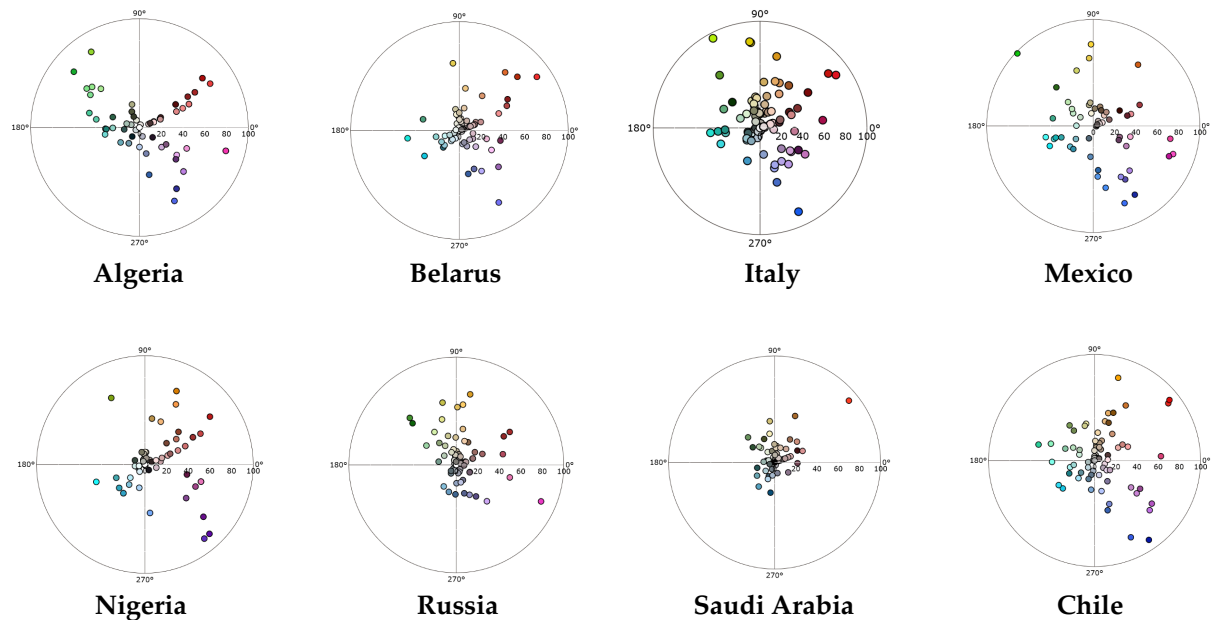

**Figure S2.** Hue ( $h^\circ$ ) and chroma (C) of colors, selected in different countries for the second color combination (chart 26); projection into the CIELCh color circle.

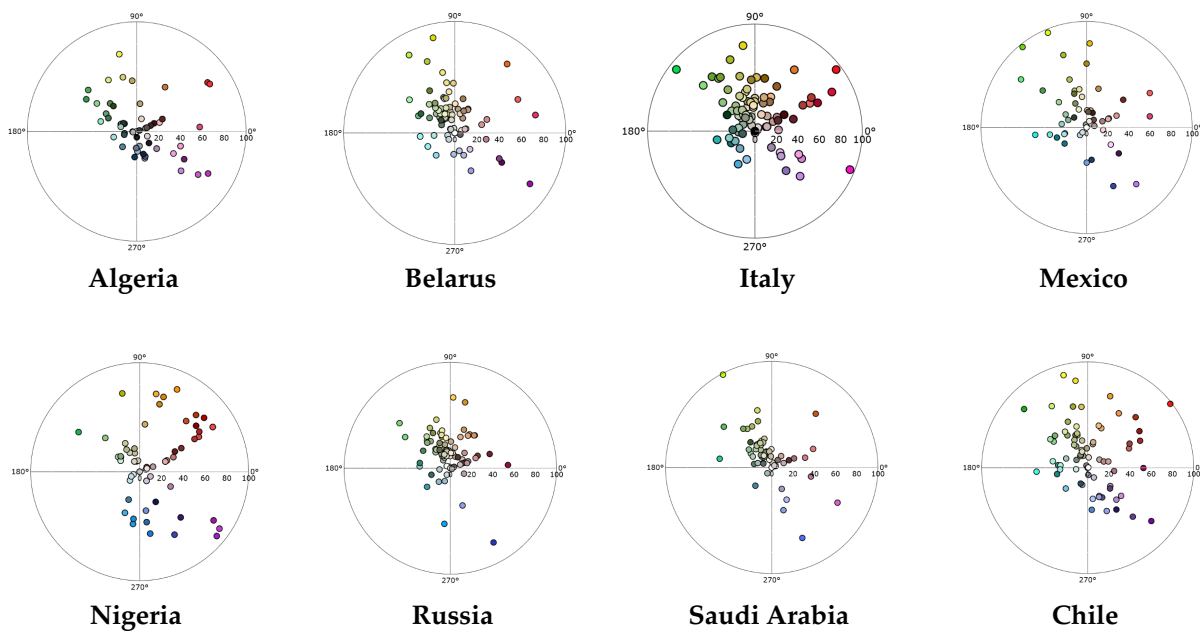

**Figure S3.** Hue ( $h^\circ$ ) and chroma (C) of colors, selected in different countries for the third color combination (chart 27); projection into the CIELCh color circle.

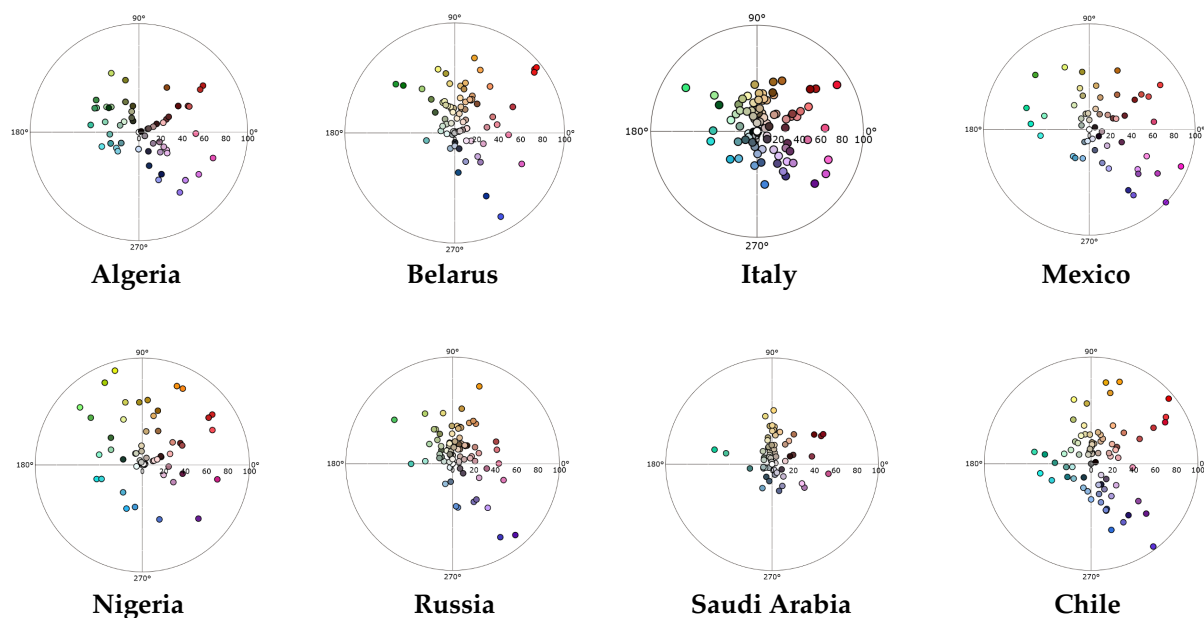

**Figure S4.** Hue ( $h^\circ$ ) and chroma (C) of colors, selected in different countries for the fourth color combination (charts 28 and 29); projection into the CIELCh color circle.

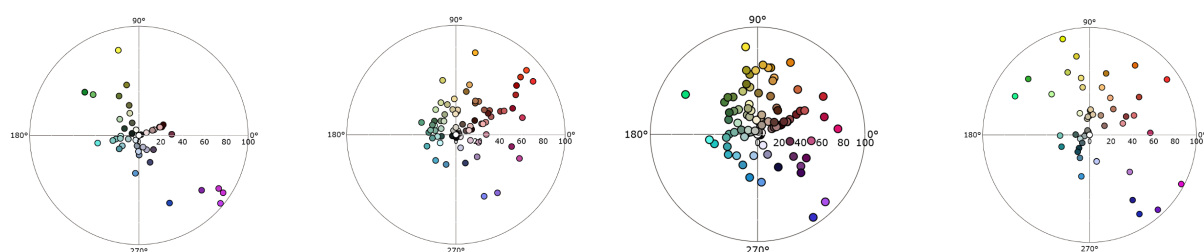

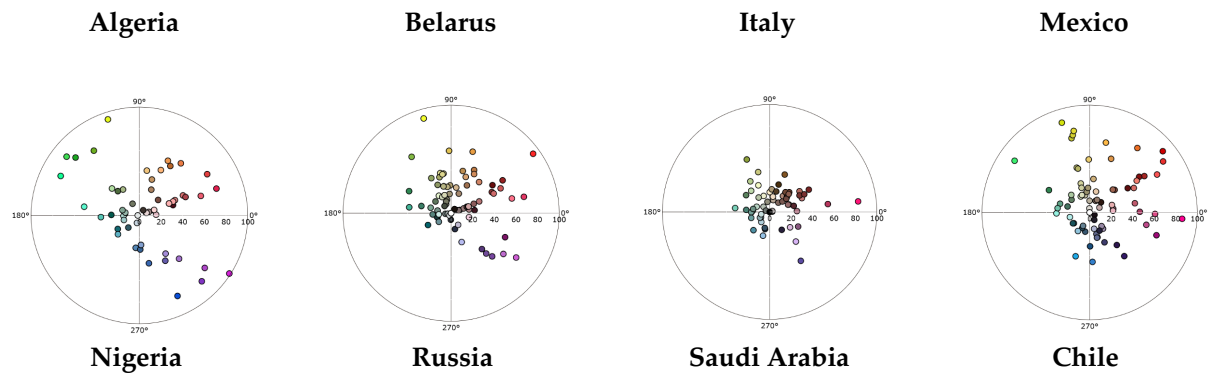

**Figure S5.** Hue ( $h^\circ$ ) and chroma (C) of colors, selected in different countries for the fifth color combination (chart 30); projection into the CIELCh color circle.

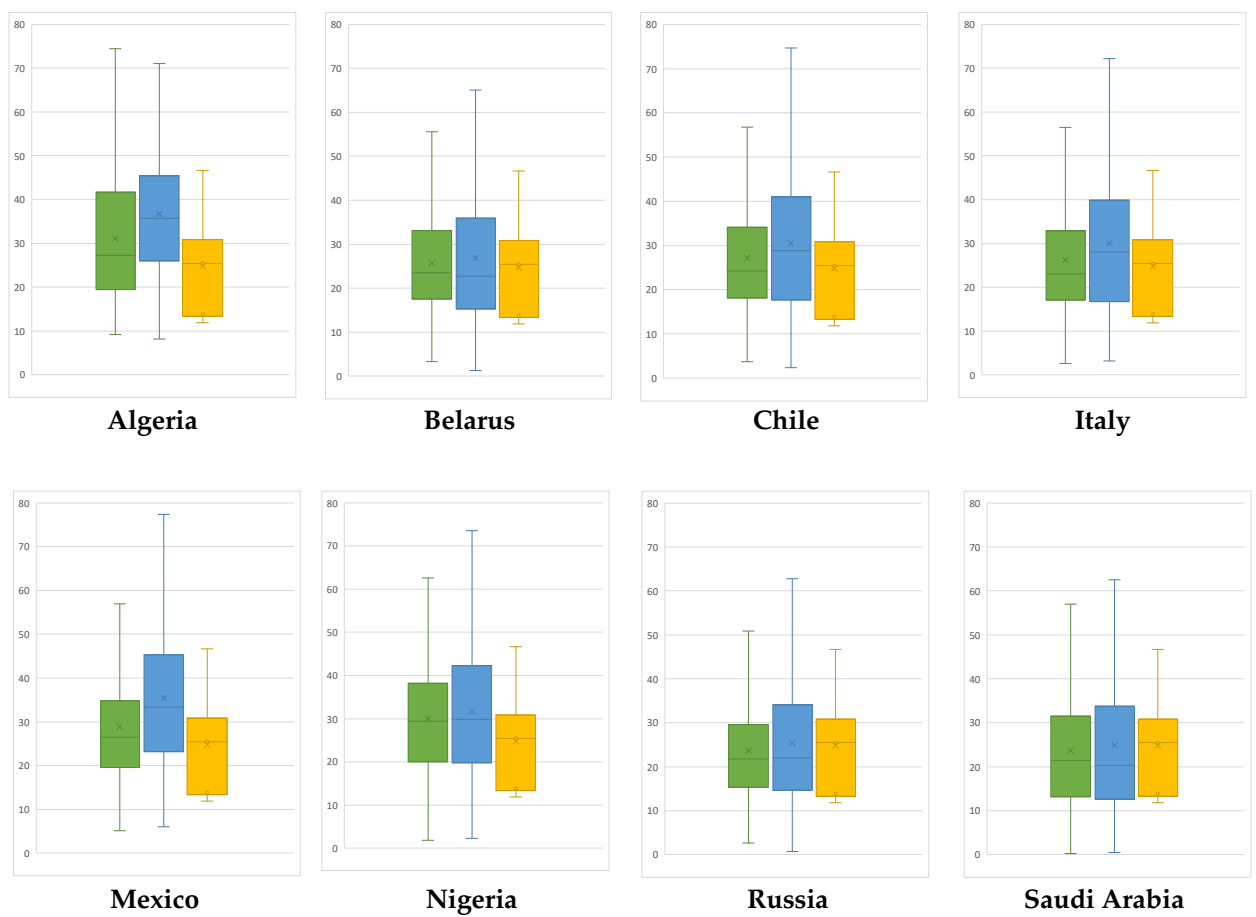

**Figure S6.** The lengths of triangle sides in different countries: color differences CIEDE2000 between the chosen color and the color of the top stripe (green), the chosen color and the color of the bottom stripe (blue), top and bottom stripe colors (yellow).

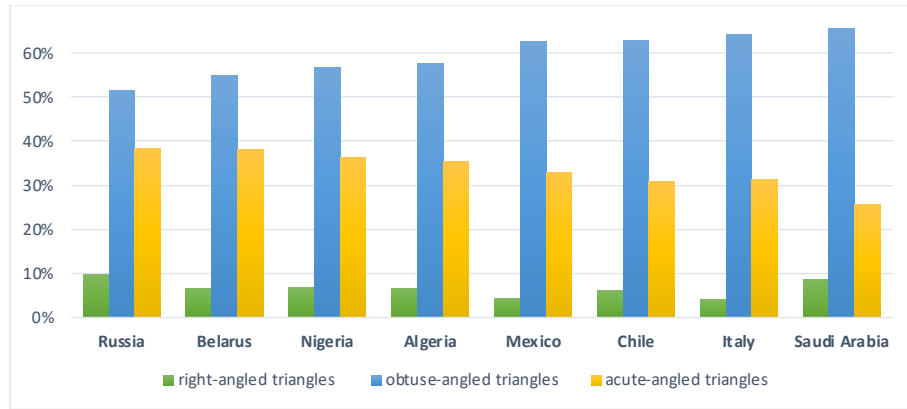

**Figure S7.** Number of right-angled, obtuse-angled, and acute-angled triangles in different countries; the countries are arranged in order of increasing number of obtuse-angled triangles.

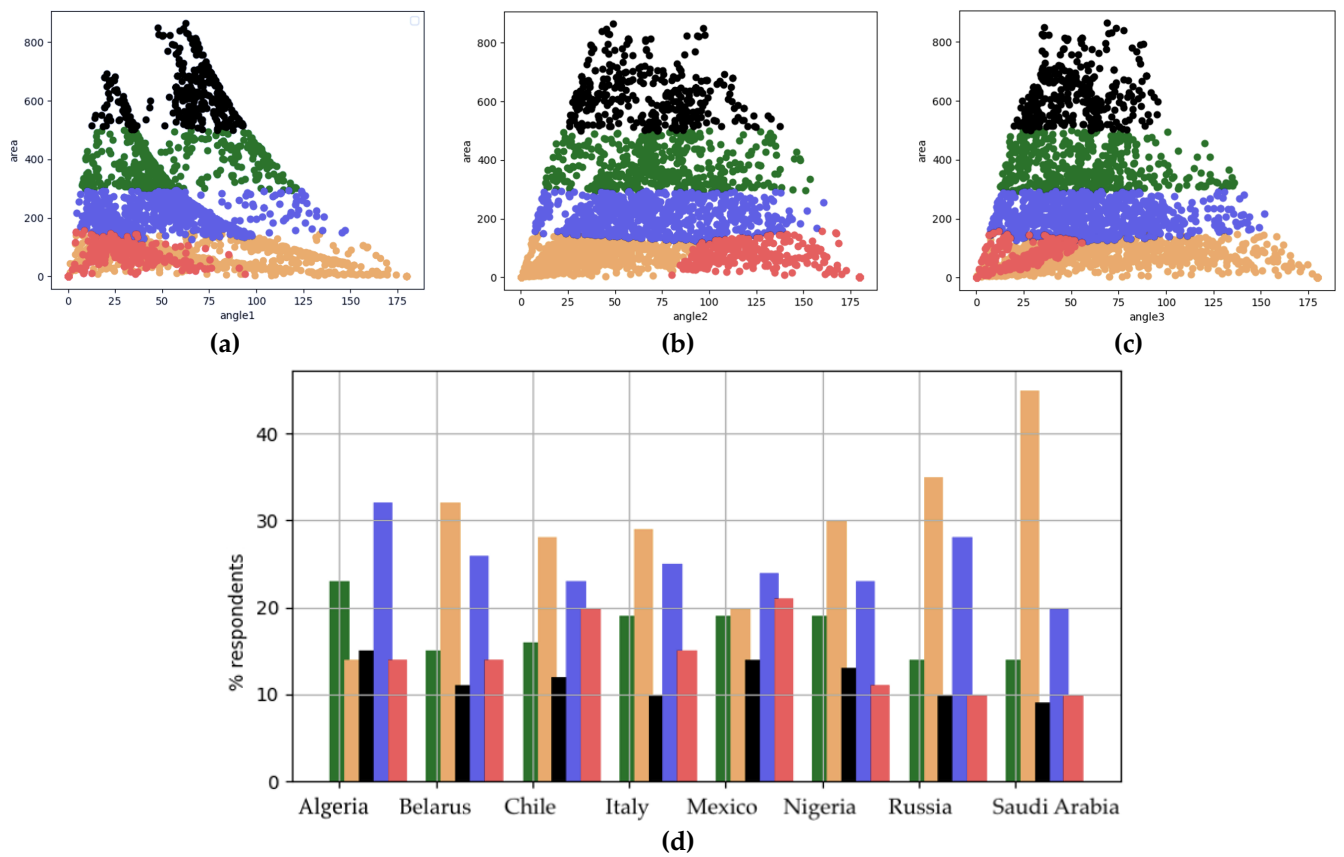

**Figure S8.** Intermediate outcomes of cluster analysis of color choices of experiment participants in the CIELAB color space: boundaries of clusters for different pairs of attributes – area and angle 1 (a), area and angle 2 (b), area and angle 3 (c); prevalence of clusters in different countries (d).
