# Supplementary material
Source: MDPI journal article supplement (https://www.mdpi.com/2076-0752/13/2/53)
Supplement: s1 [file s1]

Archive with 2 entries (2 files):
- arts-2731853-supplementary.pdf
- arts-2731853-Video_S1_compressed.mp4
